# Supplementary material for: Novel Comparison of Evaluation Metrics for Gene Ontology Classifiers Reveals Drastic Performance Differences
Source: bioRxiv or medRxiv preprint supplement (doi:10.1101/427096), 2019-09-03
Supplement: Supplementary file [file 427096-1.pdf]

**Data:** Correct GO predictions,  $T$ , for the selected set of genes  
**Data:** Key list representing parent classes for every GO class  
**parameter:** Vector of  $L$  Noise Levels,  $NL$   
default:  $NL = [0, 0.1, 0.2...1]$   
**parameter:** Number of repetitions,  $K$ , within each  $NL$   
default:  $K = 1000$   
**Result:**  $K$  by  $L$  Matrix, scores with selected Evaluation Metric  
**begin**  
    Define  $L$  as the length of  $NL$  ;  
    Define  $output$  as  $K$  by  $L$  matrix ;  
    Set  $N_{neg} = 4$  (GO classes per gene in neg. set) ;  
    **foreach**  $l$  in  $[1, 2, \dots, L]$  **do**  
         $p = NL[l]$ , current noise level ;  
  
        **#1. Create positive and negative data**  
         $P_{pos} = GeneratePosData(T, p)$  ;  
         $P_{neg} = GenerateNegData(T, N_{neg})$  ;  
  
        **#2. Create artificial classifier scores to sets**  
        **foreach**  $row$  in  $P_{pos}$  **do**  
            Select predictor score,  $s$ , from  $Normal(\mu = 1, \sigma = 0.5)$ ;  
            Add  $s$  to the current row;  
        **end**  
        **foreach**  $row$  in  $P_{neg}$  **do**  
            Select predictor score,  $s$ , from  $Normal(\mu = -1, \sigma = 0.5)$ ;  
            Add  $s$  to the current row;  
        **end**  
  
        **# 3. Combine positive and negative datasets**  
         $P = P_{pos} \cup P_{neg}$  ;  
  
        **# 4. Run Evaluation Metric,  $EvM$**   
         $Output[k, l] = EvM(P, T)$ ;  
    **end**  
**end**

**Algorithm 1:** Artificial Dilution Series (ADS) pipeline. Code uses sub-functions *GeneratePosData* and *GenerateNegData*, explained later.

**Data:** Correct GO predictions,  $T$ , for the selected set of genes

**Data:** Key list representing parent classes for every GO class

**parameter:** Noise proportion,  $p$

**output** : Modified GO predictions,  $P$

**begin**

Define  $N_T$  as the size of  $T$  ;

$P = T$ ;

$th_{noise} = round(N_T * p)$ , the size threshold for the Noise Set ;

**# Shifting step**

Define  $N_{shift}$ , a random integer between 0 and  $N_T$ ;

Select  $P_{shift}$ , a random subset of  $P$  of size  $N_{shift}$ ;

**foreach** *row* in  $P_{shift}$  **do**

  | Replace GO class with one of its nearest parents;

**end**

**# Permutation step**

Define  $NoiseSet = []$  ;

Define  $N_{err} = 0$  ;

**while**  $th_{noise} > N_{err}$  **do**

  | Select two random rows A and B from  $P \setminus NoiseSet$  ;

  | # Genes of these rows will be  $gene_A$  and  $gene_B$  ;

  | # GO classes of these rows will be  $GO_A$  and  $GO_B$  ;

  | **if**  $IsNoiseClass(gene_A, GO_B)$  and  $IsNoiseClass(gene_B, GO_A)$  **then**

    | Swap GO classes between rows A and B in  $P$  ;

    | Add A and B to  $NoiseSet$  ;

    |  $N_{err} = N_{err} + 2$  ;

  | **end**

**end**

return  $P$  ;

**end**

**Algorithm 2:** GeneratePosData: Generation of positive data with noise proportion  $p$  in ADS pipeline. Code uses IsNoiseClass function, explained later.

**Data:** Correct GO predictions,  $T$   
**parameter:**  $N_{neg}$ , number of reported negative GO classes per gene  
**output** : Negative GO predictions,  $P_{neg}$   
**begin**  
    Define  $genes(T)$ , the set of unique gene names in  $T$  ;  
    Define  $P_{neg} = []$  ;  
    **foreach**  $gene$  *in*  $genes(T)$  **do**  
         $GO_{count} = 0$  ;  
        **while**  $GO_{count} < N_{neg}$  **do**  
            pick random GO class,  $GO_{rand}$ , from GO structure ;  
            **if**  $IsNoiseClass(GO_{rand}, gene)$  **then**  
                Add ( $gene, GO_{rand}$ ) as item to  $P_{neg}$  ;  
                 $GO_{count} = GO_{count} + 1$  ;  
            **end**  
        **end**  
    **end**  
    Return  $P_{neg}$  ;  
**end**

**Algorithm 3:** GenerateNegData: Generation of negative data in ADS pipeline. Code uses IsNoiseClass function, explained later.

**Data:** Correct GO predictions,  $T$   
**Data:** Key list representing all ancestor classes for every GO class  
**Data:** Evaluated GO class,  $GO_{eval}$   
**Data:** Evaluated gene,  $gene_{eval}$   
**parameter:** Noise threshold,  $th$   
                   default:  $th = 0.1$   
**output**       : TRUE or FALSE  
**begin**  
   | Get the set of ancestor classes,  $A_{eval}$ , for  $GO_{eval}$  ;  
   | Define  $J_{max} = 0$  ;  
   | **foreach**  $row$  in  $T$  **do**  
   |   | Let  $gene_{test}$  be the gene of the current row ;  
   |   | **if**  $gene_{test}$  is  $gene_{eval}$  **then**  
   |   |   | Let  $GO_{test}$  be the GO class of the current row;  
   |   |   | Get the set of ancestor classes,  $A_{test}$ , for  $GO_{test}$  ;  
   |   |   | Calculate  $J_{test}$ , Jaccard correlation between  $A_{test}$  and  $A_{eval}$ ;  
   |   |   | **if**  $J_{test} > J_{max}$  **then**  
   |   |   |   |  $J_{max} = J_{test}$   
   |   |   | **end**  
   |   | **end**  
   | **end**  
   | **if**  $J_{max} < th$  **then**  
   |   | Return TRUE ;  
   | **else**  
   |   | Return FALSE ;  
   | **end**  
**end**

**Algorithm 4:** IsNoiseClass. This algorithm tests if GO class qualifies as noise. This is tested against the annotations of the selected gene
