# Supplementary material for: Novel Comparison of Evaluation Metrics for Gene Ontology Classifiers Reveals Drastic Performance Differences
Source: bioRxiv or medRxiv preprint supplement (doi:10.1101/427096), 2019-09-03
Supplement: Supplementary file [file 427096-3.pdf]

| Type                  | Abbreviation   | Core function                | Data summary | Thresh. function | IC weight | SemSim. Sum. | Popular | Neg. Ctrl | Novel | Simple EvM |
|-----------------------|----------------|------------------------------|--------------|------------------|-----------|--------------|---------|-----------|-------|------------|
| AUC metrics           | US AUC         | Area Under ROC Curve         | Unstructured | -                | -         | -            |         | +         |       | +          |
|                       | GC AUC         | Area Under ROC Curve         | Gene-Centric | -                | -         | -            |         |           |       |            |
|                       | TC AUC         | Area Under ROC Curve         | Term-Centric | -                | -         | -            | +       |           |       |            |
|                       | US AUCPR       | Area Under Prec-Recall Curve | Unstructured | -                | -         | -            | +       |           |       | +          |
|                       | GC AUCPR       | Area Under Prec-Recall Curve | Gene-Centric | -                | -         | -            |         |           |       |            |
|                       | TC AUCPR       | Area Under Prec-Recall Curve | Term-Centric | -                | -         | -            |         |           |       |            |
|                       | Fmax           | F-metric                     | ?            | max              | -         | -            | +       |           |       |            |
| group metrics         | US Jacc        | Jaccard                      | Unstructured | max              | -         | -            |         |           |       | +          |
|                       | GC Jacc        | Jaccard                      | Gene-Centric | max              | -         | -            |         |           |       | +          |
|                       | ic Smin1       | Euclidean distance           | Unstructured | max              | IC1       | -            |         |           |       |            |
|                       | ic Smin2       | Euclidean distance           | Gene-Centric | max              | IC1       | -            |         |           | +     |            |
|                       | ic Smin3 ??    | Euclidean distance           | Unstructured | max              | IC1       | -            |         |           | +     |            |
|                       | ic SimGIC      | Weighted Jaccard             | Gene-Centric | max              | IC1       | -            |         |           |       |            |
|                       | ic SimGIC2     | Weighted Jaccard             | Unstructured | max              | IC1       | -            |         |           | +     |            |
|                       | ic2 Smin1      | Euclidean distance           | Unstructured | max              | IC2       | -            | +       |           |       |            |
|                       | ic2 Smin2      | Euclidean distance           | Gene-Centric | max              | IC2       | -            |         |           | +     |            |
|                       | ic2 Smin3 ??   | Euclidean distance           | Gene-Centric | max              | IC2       | -            |         |           | +     |            |
|                       | ic2 SimGIC     | Weighted Jaccard             | Gene-Centric | max              | IC2       | -            |         |           |       |            |
|                       | ic2 SimGIC2    | Weighted Jaccard             | Unstructured | max              | IC2       | -            |         |           | +     |            |
| Semantic Similarities | Resnik score A | Resnik semantics             | Gene-Centric | max              | IC1       | A            |         |           |       |            |
|                       | Resnik score B | Resnik semantics             | Gene-Centric | max              | IC1       | B            |         | +         |       |            |
|                       | Resnik score C | Resnik semantics             | Gene-Centric | max              | IC1       | C            |         | +         |       |            |
|                       | Resnik score D | Resnik semantics             | Gene-Centric | max              | IC1       | D            |         |           |       |            |
|                       | Resnik score E | Resnik semantics             | Gene-Centric | max              | IC1       | E            |         |           | +     |            |
|                       | Resnik score F | Resnik semantics             | Gene-Centric | max              | IC1       | F            |         |           | +     |            |
|                       | Lin score A    | Lin semantics                | Gene-Centric | max              | IC1       | A            |         |           |       |            |
|                       | Lin score B    | Lin semantics                | Gene-Centric | max              | IC1       | B            |         | +         |       |            |
|                       | Lin score C    | Lin semantics                | Gene-Centric | max              | IC1       | C            |         | +         |       |            |
|                       | Lin score D    | Lin semantics                | Gene-Centric | max              | IC1       | D            |         |           |       |            |
|                       | Lin score E    | Lin semantics                | Gene-Centric | max              | IC1       | E            |         |           | +     |            |
|                       | Lin score F    | Lin semantics                | Gene-Centric | max              | IC1       | F            |         |           | +     |            |
|                       | AJacc score A  | Jaccard semantics            | Gene-Centric | max              | -         | A            |         |           |       |            |
|                       | AJacc score B  | Jaccard semantics            | Gene-Centric | max              | -         | B            |         | +         |       |            |
|                       | AJacc score C  | Jaccard semantics            | Gene-Centric | max              | -         | C            |         | +         |       |            |
|                       | AJacc score D  | Jaccard semantics            | Gene-Centric | max              | -         | D            |         |           |       |            |
|                       | AJacc score E  | Jaccard semantics            | Gene-Centric | max              | -         | E            |         |           | +     |            |
|                       | AJacc score F  | Jaccard semantics            | Gene-Centric | max              | -         | F            |         |           | +     |            |
